# Supplementary material for: Donor Cell Acute Myeloid Leukemia after Hematopoietic Stem Cell Transplantation for Chronic Granulomatous Disease: A Case Report and Literature Review
Source: MDPI journal article supplement (doi:10.3390/genes14112085), 2023-11-16
Supplement: s1 [file s1]

## Supplementary file 1: Details on the four HSCT

### 1 – HSCT 10.09.2008

Conditioning regimen: Fludarabin + Busulfan + Thiotepa

GVHD profilaxis: Cyclosporine

Cells infused (HLA-identical sister as donor):  $4.2 \times 10^8/\text{kg}$

Engraftment: 500 neutrophils/ $\mu\text{l}$  at day + 15

### 2 – HSCT 27.10.2010

Conditioning regimen: Aracytine + Melphalan

GVHD profilaxis: Cyclosporine

Cells infused (HLA-identical sister as donor):  $3.5 \times 10^8/\text{kg}$

Engraftment: 500 neutrophils/ $\mu\text{l}$  on day + 12

### 3 – HSCT 10.12.2012

Conditioning regimen: Aracytine + Melphalan

GVHD profilaxis: Cyclosporine + ATG

Cells infused (unrelated cord blood donor):  $5.2 \times 10^7/\text{kg}$

Engraftment: 500 neutrophils/ $\mu\text{l}$  on day + 17

### 4 – HSCT 27.6.2018

Conditioning regimen: Thiotepa + Threosulfan + Fludarabin + ATG

GVHD prophylaxis: alpha/beta T lymphocyte and CD+19 in vitro depletion

Cells infused (partially matched mother as donor): TCN  $2.2 \times 10^8/\text{kg}$ , CD34+  $6.11 \times 10^6/\text{kg}$ , T CD3+  $5.94 \times 10^6/\text{kg}$ , TCR  $\alpha\beta$ +  $22 \times 10^3/\text{kg}$ , TCR  $\gamma\delta$ +  $5.94 \times 10^6/\text{kg}$

Engraftment: day +9, platelet engraftment day +17
