# Supplementary material for: Donor Cell Acute Myeloid Leukemia after Hematopoietic Stem Cell Transplantation for Chronic Granulomatous Disease: A Case Report and Literature Review
Source: MDPI journal article supplement (doi:10.3390/genes14112085), 2023-11-16
Supplement: s1 [file s1]

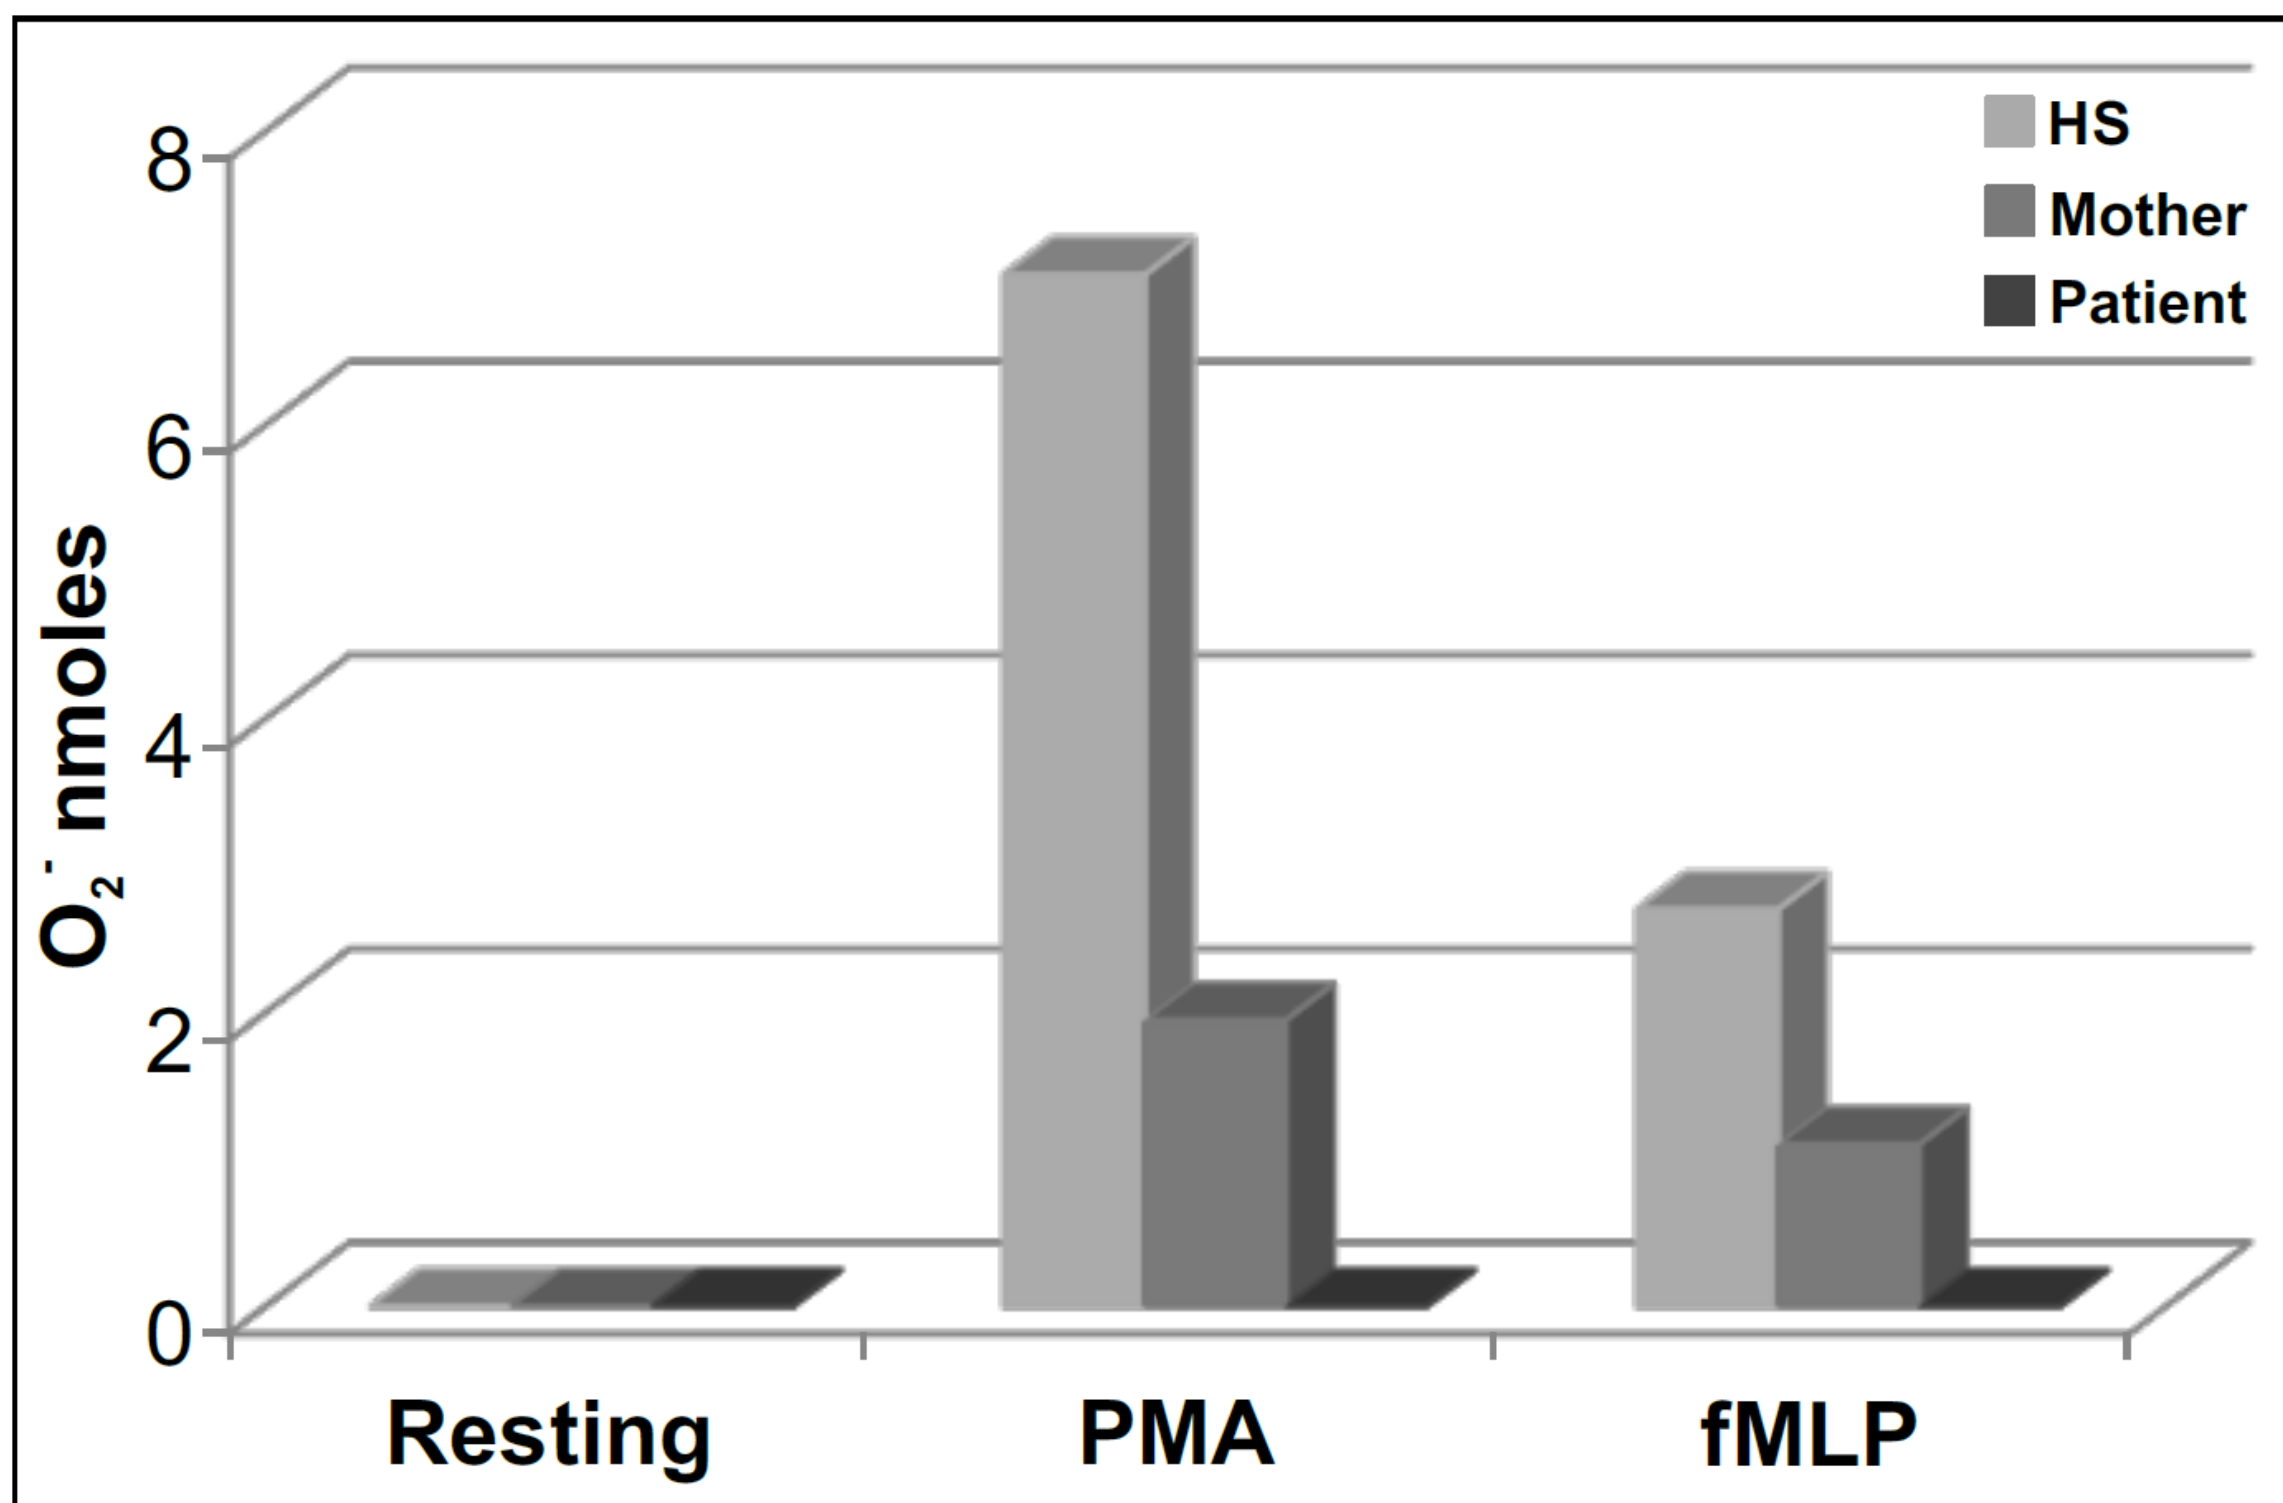

### Supplementary Figure S1

Production of  $O_2^-$  by neutrophils. About  $2 \times 10^5$  neutrophils of a healthy subject (HS), the patient and his mother suspended in HBSS and stimulated with 100 nM fMLP or 20 ng/mL PMA for 30 minutes. The  $O_2^-$  production was evaluated by cytochrome c reduction.

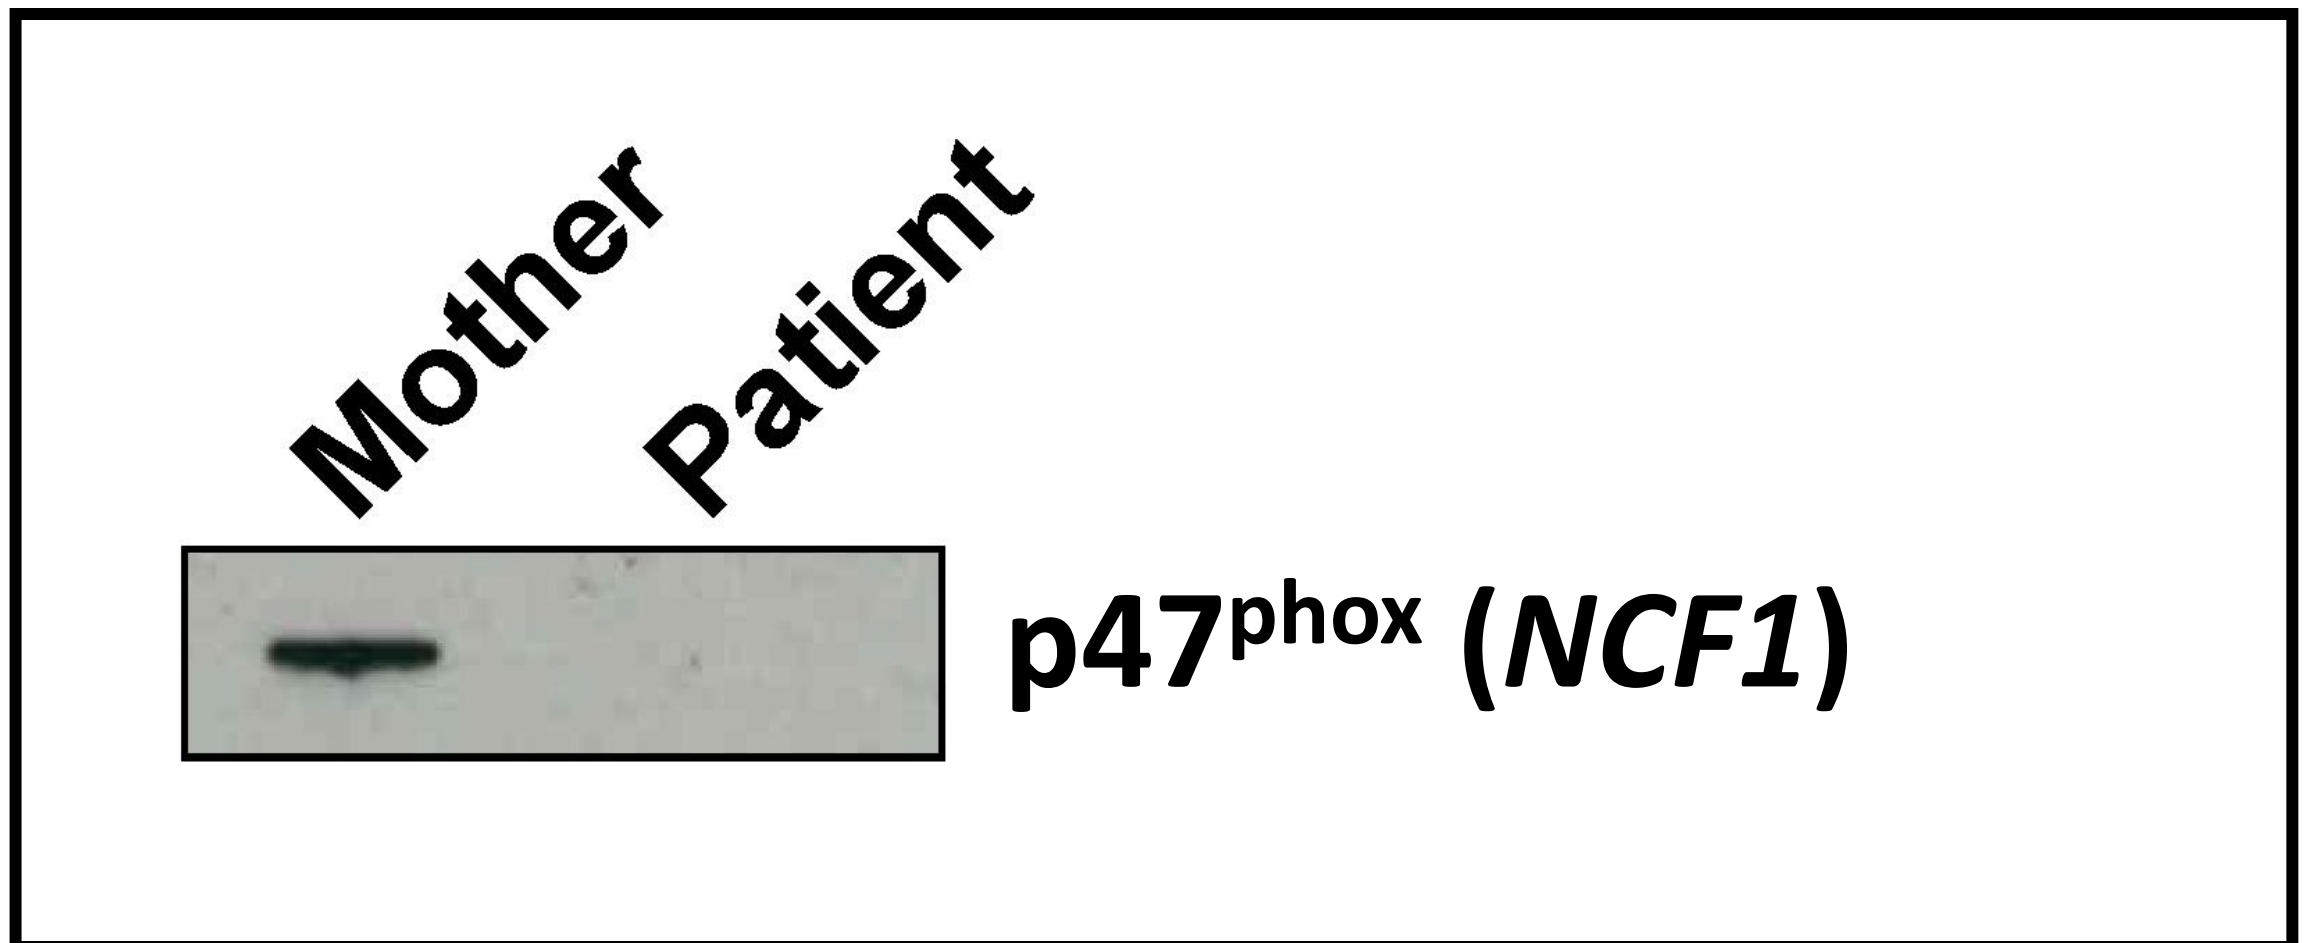

**Supplementary Figure S2**

Analysis of p47<sup>phox</sup> expression by Western blot of neutrophils lysates of the patient and his mother with anti-p47<sup>phox</sup> antibody.

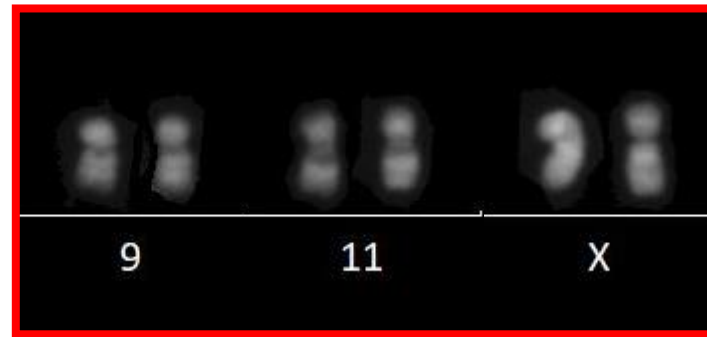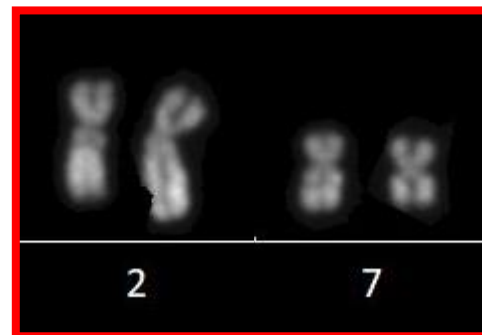

**A**

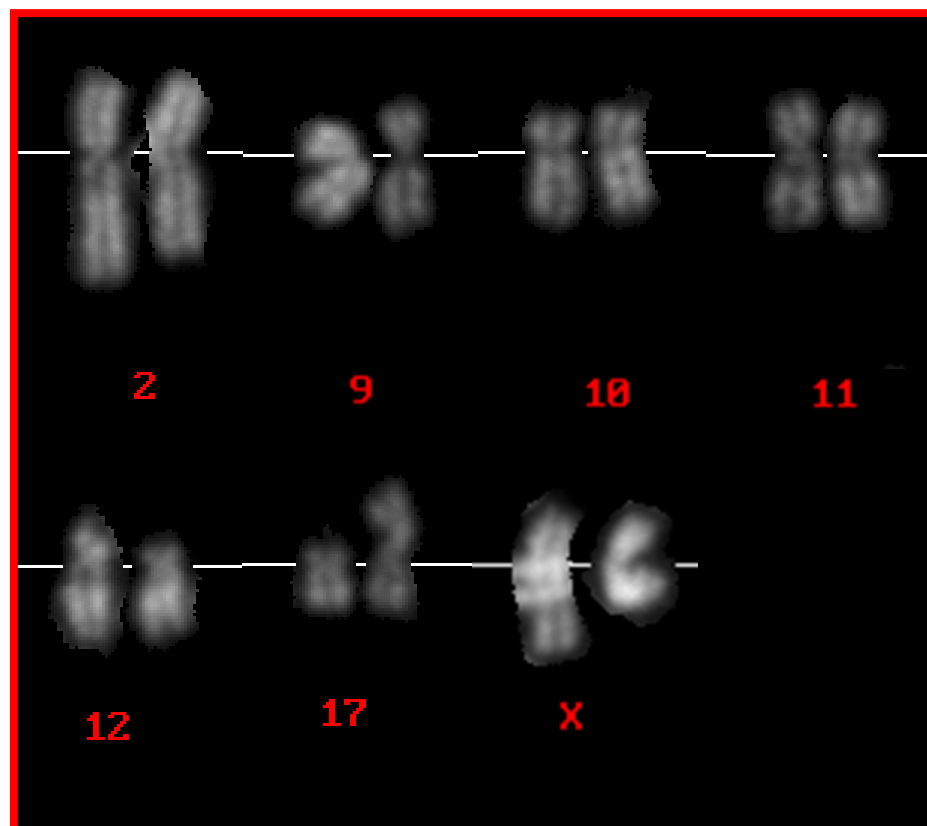

**B**

### Supplementary Figure S3

Cut-off of Q-banded chromosomes from a karyotype from the analysis on BM of 2010 (A), showing the translocation  $t(9;11)(p21;q23)$ , the XX sex chromosomes and, below, the balanced translocation  $t(2;7)(q33;q22)$ . In B, the cut-off from a karyotype from the analysis of 2018, showing the der(2) chromosome derived by the translocation  $t(2;10)(q31.3;q23.31)$ , the translocation  $t(9;11)$ , the normal chromosomes 10, the deletion  $del(12)(p11.2)$ , the dicentric isochromosome  $i(17)(p11.2)$ , and the XX chromosomes.

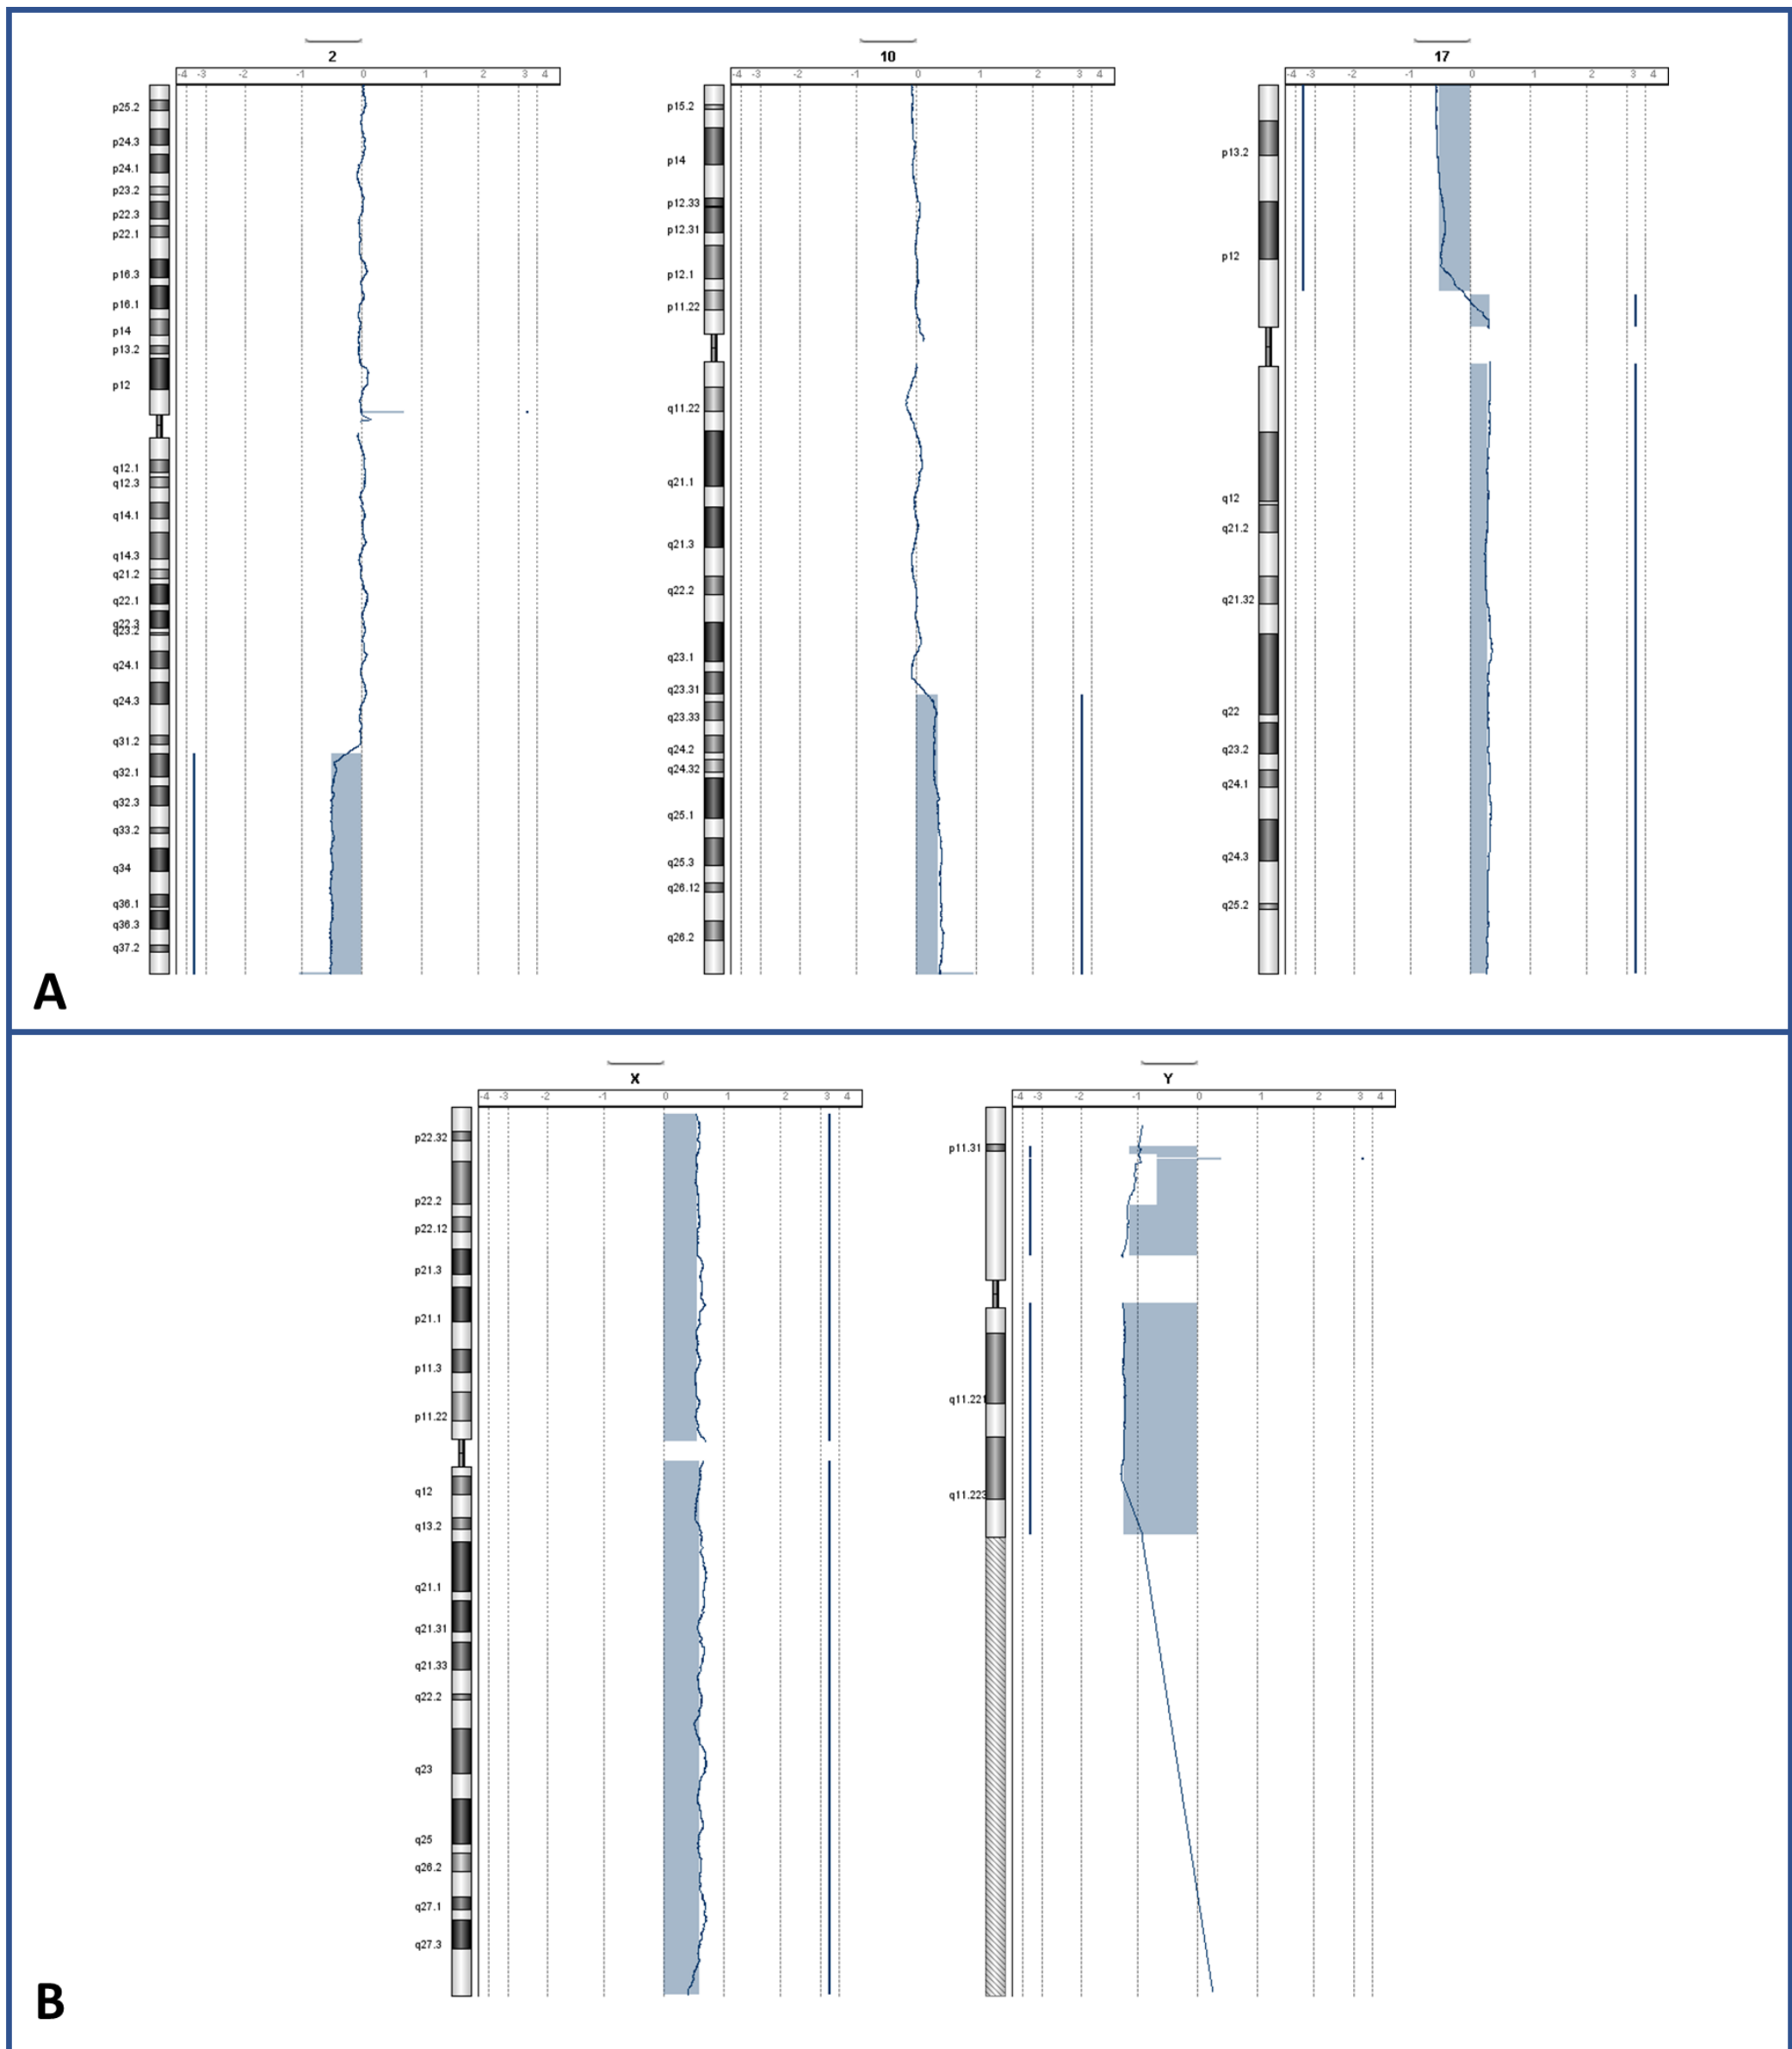

## Supplementary Figure S4

Results of the profiles obtained with aCGH performed in 2018 in DNA from BM. In panel A, the partial monosomy of the long arm of chromosome 2 and the partial trisomy of the long arm of chromosome 10 due to the unbalanced translocation  $t(2;10)(q31.3;q23.31)$ , and the dicentric isochromosome  $idic(17)(p11.2)$ . In panel B, the profiles of the chromosomes X and Y, showing that the great majority of the cells have XX sex chromosomes (disomy X in almost all cells and virtually no material of the Y chromosome).
